# Supplementary material for: Identification of a founder effect involving n.197C>T variant in RMRP gene associated to cartilage-hair hypoplasia syndrome in Brazilian patients
Source: PubMed Central journal article supplement (PMC11166637; doi:10.1038/s41598-024-64407-8), 2024-06-11
Supplement: 41598_2024_64407_MOESM1_ESM.pdf [file 41598_2024_64407_MOESM1_ESM.pdf]

**Identification of a founder effect involving n.197C>T variant in *RMRP* gene associated to Cartilage-Hair Hypoplasia syndrome in Brazilian patients**

Maria Eduarda Gomes<sup>1\*</sup>, Fernanda Kehdy<sup>2</sup>, Fernanda Saloum de Neves-Manta<sup>2</sup>, Dafne Dain Gandelman Horovitz<sup>3</sup>, Maria Teresa Sanseverino<sup>4</sup>, Gabriela Ferraz Leal<sup>5</sup>, Têmis Maria Felix<sup>4</sup>, Denise Pontes Cavalcanti<sup>6</sup>, Juan Clinton Llerena Jr.<sup>3,7,8</sup>, Sayonara Gonzalez<sup>1</sup>

**S1 Table: Genotype of Brazilian patients with CHH (NCBI reference sequence: NR\_003051.4)**

| Sample ID       | Allele 1                                                | Allele 2           |
|-----------------|---------------------------------------------------------|--------------------|
| 1               | g.-20_-1dup20(ACTCTGTGAAGCTGAGGACG)                     | g.197C>T           |
| 2               | n.-24_-3dup22(TACTACTCTGTGAAGCTGAGAA)                   | n.197C>T           |
| 3               | n.-18_-2trip17(TCTGTGAAGCTGAGGAC)                       | n.195G>A           |
| 4               | n.-23_-14dup10(ACTACTCTGT)                              | n.98_99dup2(TG)    |
| 5               | n.-22_-13dup9(TACTCTGTG)                                | n.197C>T           |
| 6               | n.98_99dup2(TG)                                         | n.197C>T           |
| 7               | n.11T>A                                                 | n.197C>T           |
| <b>8</b>        | <b>n.-21_-2dup20(TACTCTGTGAAGCTGAGGAC)</b>              | <b>n.197C&gt;T</b> |
| <b>9</b>        | <b>n.-24_-3dup22(TACTACTCTGTGAAGCTGAGAA)</b>            | <b>n.197C&gt;T</b> |
| <b>10</b>       | <b>n.-5_+5dup10(GGACGTGGTT)</b>                         | <b>n.72A&gt;G</b>  |
| <b>11</b>       | <b>n.197C&gt;T</b>                                      | <b>n.246G&gt;C</b> |
| <b>12</b>       | <b>n.-18_-2dup17(TCTGTGAAGCTGAGGAC)</b>                 | <b>n.197C&gt;T</b> |
| <b>13</b>       | <b>n.-24_-3dup22(TACTACTCTGTGAAGCTGAGAA)</b>            | <b>n.197C&gt;T</b> |
| 14              | n.-18_-2dup17(TCTGTGAAGCTGAGGAC)                        | n.182G>A           |
| 15              | n.7G>T                                                  | n.197C>T           |
| 16 <sup>#</sup> | n.37C>G                                                 | n.253A>C           |
| 17 <sup>#</sup> | n.37C>G                                                 | n.253A>C           |
| 18              | n.-12_+2dup14(AAGCTGAGGACGTG)                           | n.197C>T           |
| 19              | n.-7_-6ins20(GGGACTACTCTGTGAAGCTG)                      | n.197C>T           |
| 20              | n.-24_-3dup22(TACTACTCTGTGAAGCTGAGAA)                   | n.98_99dup2(TG)    |
| 21              | n.98_99dup2(TG)                                         | n.148G>C           |
| 22              | n.7G>T                                                  | n.197C>T           |
| 23              | n.-21_-2dup20(TACTCTGTGAAGCTGAGAAC) +<br>n.262_332dup70 | n.197C>T           |
| 24*             | n.-24_-3dup22(TACTACTCTGTGAAGCTGAGAA)                   | n.197C>T           |
| 25*             | n.-24_-3dup22(TACTACTCTGTGAAGCTGAGAA)                   | n.197C>T           |
| 26              | n.37C>G                                                 | n.99G>A            |
| 27              | n.-24_-3dup22(TACTACTCTGTGAAGCTGAGAA)                   | n.197C>T           |
| 28              | n.70_71ins1(T)                                          | n.197C>T           |
| <b>29</b>       | <b>n.-19_+4dup23(CTCTGTGAAGCTGAGAACGTGGT)</b>           | <b>n.6C&gt;T</b>   |
| <b>30</b>       | <b>n.37C&gt;T</b>                                       | <b>n.197C&gt;T</b> |
| <b>31</b>       | <b>n.-24_-3dup22(TACTACTCTGTGAAGCTGAGAA)</b>            | <b>n.197C&gt;T</b> |
| <b>32</b>       | <b>n.-23_-9dup15(ACTACTCTGTGAAGC)</b>                   | <b>n.197C&gt;T</b> |

Data previously published and available in Gomes *et al.*, 2019. New patients included in the cohort are indicated in bold. #, \* indicate siblings;

**S3 Table:** Individual ancestry averages analyzed for 3 parental populations generated by Software Structure.

| PATIENT | % AFR | % EUR | % AME |
|---------|-------|-------|-------|
| 1       | 0.120 | 0.719 | 0.161 |
| 2       | 0.282 | 0.537 | 0.181 |
| 3       | 0.178 | 0.686 | 0.136 |
| 4       | 0.108 | 0.706 | 0.187 |
| 5       | 0.280 | 0.493 | 0.226 |
| 6       | 0.238 | 0.502 | 0.260 |
| 7       | 0.389 | 0.458 | 0.154 |
| 14      | 0.138 | 0.606 | 0.257 |
| 15      | 0.199 | 0.631 | 0.170 |
| 16      | 0.331 | 0.532 | 0.137 |
| 17      | 0.345 | 0.495 | 0.159 |
| 18      | 0.257 | 0.642 | 0.101 |
| 19      | 0.233 | 0.570 | 0.197 |
| 20      | 0.384 | 0.493 | 0.123 |
| 21      | 0.127 | 0.699 | 0.174 |
| 22      | 0.174 | 0.546 | 0.280 |
| 23      | 0.437 | 0.371 | 0.192 |
| 24      | 0.217 | 0.612 | 0.171 |
| 25      | 0.251 | 0.605 | 0.144 |
| 26      | 0.159 | 0.734 | 0.107 |
| 27      | 0.191 | 0.647 | 0.162 |

S3 Table: List of haplotypes found in patients

| Patient ID | rs10972552 | rs7021463 | rs1339374 | rs1361338 | Variant                               |
|------------|------------|-----------|-----------|-----------|---------------------------------------|
| 1          | T          | C         | G         | A         | g.197C>T                              |
|            | T          | C         | G         | C         | g.-20_-1dup20(ACTCTGTGAAGCTGAGGACG)   |
| 2          | T          | G         | G         | C         | g.-24_-3dup22(TACTACTCTGTGAAGCTGAGAA) |
|            | T          | C         | G         | A         | g.197C>T                              |
| 3          | T          | C         | G         | A         | g.195G>A                              |
|            | C          | C         | G         | A         | g.-18_-2trip17(TCTGTGAAGCTGAGGAC)     |
| 4          | C          | C         | G         | C         | g.-23_-14dup10(ACTACTCTGT)            |
|            | T          | C         | G         | A         | g.98_99dup2(TG)                       |
| 5          | T          | C         | G         | A         | g.197C>T                              |
|            | T          | G         | G         | C         | g.-21_-13dup9(TACTCTGTG)              |
| 6          | T          | C         | G         | A         | g.197C>T                              |
|            | T          | C         | G         | A         | g.98_99dup2(TG)                       |
| 7          | C          | C         | A         | A         | g.11T>A                               |
|            | T          | C         | G         | A         | g.197C>T                              |
| 8          | C          | C         | A         | A         | g.-21_-2dup20(TACTCTGTGAAGCTGAGGAC)   |
|            | T          | C         | G         | A         | g.197C>T                              |
| 9          | T          | C         | G         | A         | g.197C>T                              |
|            | T          | G         | G         | C         | g.-24_-3dup22(TACTACTCTGTGAAGCTGAGAA) |
| 10         | C          | C         | A         | A         | g.-5_+5dup10(GGACGTGGTT)              |
|            | C          | C         | G         | C         | g.72A>G                               |
| 11         | T          | C         | G         | A         | g.197C>T                              |
|            | C          | C         | G         | C         | g.246G>C                              |
| 14         | C          | C         | A         | A         | g.182G>A                              |
|            | T          | C         | G         | A         | g.-18_-2dup17(TCTGTGAAGCTGAGGAC)      |
| 15         | T          | C         | G         | A         | g.197C>T                              |

|    |   |   |   |   |                                        |
|----|---|---|---|---|----------------------------------------|
|    | T | C | G | A | g.7G>T                                 |
| 16 | C | C | G | C | g.37C>G                                |
|    | C | C | A | C | g.253A>C                               |
| 18 | T | C | G | A | g.197C>T                               |
|    | T | C | G | A | g.-12_+2dup14(AAGCTGAGGACGTG)          |
| 19 | T | C | G | A | g.197C>T                               |
|    | C | C | G | C | g.-7_-6ins20(GGGACTACTCTGTGAAGCTG)     |
| 20 | T | C | G | A | g.98_99dup2(TG)                        |
|    | T | G | G | C | g.-24_-3dup22(TACTACTCTGTGAAGCTGAGAA)  |
| 21 | C | C | G | C | g.148G>C                               |
|    | T | C | G | A | g.98_99dup2(TG)                        |
| 22 | T | C | G | A | g.197C>T                               |
|    | T | C | G | A | g.7G>T                                 |
| 23 | T | C | G | A | g.197C>T                               |
|    | T | G | G | C | g.-21_-2dup20(TACTCTGTGAAGCTGAGAAC)    |
| 25 | T | C | G | A | g.197C>T                               |
|    | T | G | G | C | g.-24_-3dup22(TACTACTCTGTGAAGCTGAGAA)  |
| 26 | T | C | G | A | g.99G>A                                |
|    | T | C | G | A | g.37C>G                                |
| 27 | T | G | G | C | g.-24_-3dup22(TACTACTCTGTGAAGCTGAGAA)  |
|    | T | C | G | A | g.197C>T                               |
| 29 | C | C | G | C | g.37C>T                                |
|    | C | C | G | C | g.197C>T                               |
| 30 | T | C | G | A | g.6C>T                                 |
|    | T | G | G | C | g.-19_+4dup23(CTCTGTGAAGCTGAGAACGTGGT) |
| 31 | T | C | G | A | g.197C>T                               |
|    | T | G | G | C | g.-24_-3dup22(TACTACTCTGTGAAGCTGAGAA)  |
| 32 | T | C | G | A | g.197C>T                               |
|    | T | C | G | A | g.-23_-9dup15(ACTACTCTGTGAAGC)         |
